# Supplementary material
Source: PubMed Central journal article supplement (PMC4038675)
Supplement: NIHMS581861-supplement-Supp_Material.pdf [file NIHMS581861-supplement-Supp_Material.pdf]

## Supporting Information

Quorum regulatory small RNAs repress type VI secretion in *Vibrio cholerae*

Yi Shao<sup>1, a</sup>, Bonnie L. Bassler<sup>1, 2\*</sup>

<sup>1</sup> Department of Molecular Biology, Princeton University, Princeton, NJ, USA

<sup>2</sup> Howard Hughes Medical Institute, Chevy Chase, MD, USA

\* Corresponding author

<sup>a</sup> Current address:

Department of Microbial Pathogenesis, Yale School of Medicine, New Haven, CT, USA

This supporting information contains:

Figures S1 to S7

Tables S1 to S3

References

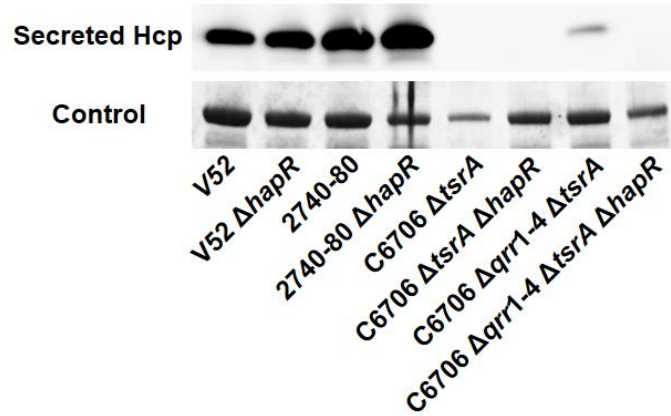

**Figure S1**

Western blot showing secreted Hcp protein in *V. cholerae* V52, V52  $\Delta hapR$  (YS2030), 2740-80, 2740-80  $\Delta hapR$  (YS2029), O1 El Tor C6706  $\Delta tsrA$  (YS2031), C6706  $\Delta tsrA$ ,  $\Delta hapR$  (YS2034), C6706  $\Delta qrr1-4$ ,  $\Delta tsrA$  (YS2039), and C6706  $\Delta qrr1-4$ ,  $\Delta tsrA$ ,  $\Delta hapR$  (YS2040). When comparing these results to those in the main text, note that the amount of secreted Hcp by the pandemic strain C6706  $\Delta qrr1-4$ ,  $\Delta tsrA$  is lower than that secreted by the non-pandemic strains V52 and 2740-80.

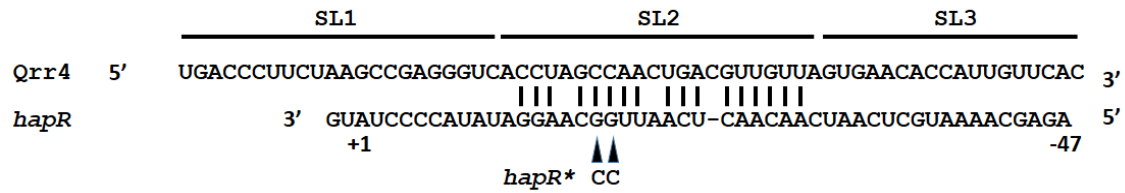

**Figure S2**

Putative base pairing between *V. cholerae* Qrr4 and the *hapR* 5'UTR was predicted by RNAhybrid (<http://bibiserv.techfak.uni-bielefeld.de/rnahybrid/>). The *hapR* translational start site is denoted +1. *hapR\** contains the indicated GG to CC double nucleotide change. Sequences encoding stem-loops are shown with over-lines.

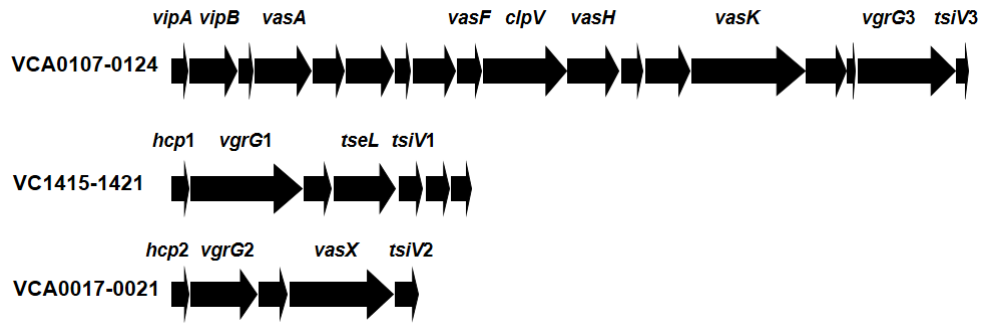

**Figure S3**

Schematic representation of the T6SS gene clusters in *V. cholerae*.

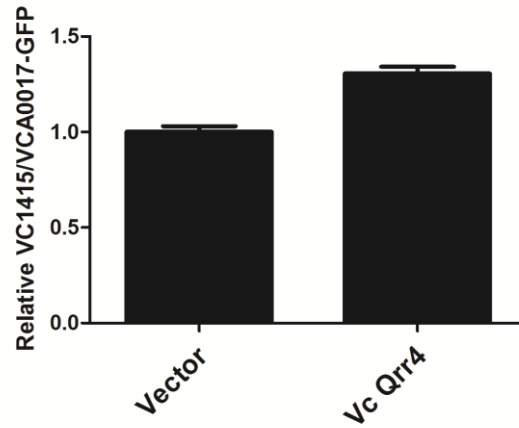

**Figure S4**

Fluorescence from *E. coli* carrying a plasmid with an IPTG inducible translational GFP fusion to VC1415/VCA0017 (pYS347) was measured in the presence of an empty vector (pLF253) or a vector expressing tetracycline inducible *V. cholerae qrr4* (Vc Qrr4, pYS245). The 5' UTR is identical upstream of VC1415 and VCA0017. A plasmid harboring a GFP translational fusion to this region was constructed. It reports on the first gene in both of the two small clusters. GFP production from three independent cultures was measured and the means and SEMs are shown, with all measurements normalized to the mean of the vector controls.

*V. cholerae*

Qrr1 UGACCCGCA-----AGGGUCACCUAGCCAACUGACGUUGUUAGUGAAUAUCA-UGUUCACAAA-UAACA---GCCAAUAGACUCA-UUCUA--UUGGCUAUUUUUUU

Qrr2 UGACCCUUG-UUAAGCCGAGGGUCACCUAGCCAACUGACGUUGUUAGUGAAUAGU-AU-UGUUCACAUCAUAUAUA--GCCAAUCGGGUUCUUGCGA-UUGGCUAUUUUUUU

Qrr3 UGACCCUAAUUAAGCCGAGGGUCACCUAGCCAACUGACGUUGUUAGUGAAUGAA-AU-UGUUCACAUUUUUUAUCAGCCAAUCACCCUU-UUGUGA-UUGGCUUUUUU

Qrr4 UGACCCUUC--UAAAGCCGAGGGUCACCUAGCCAACUGACGUUGUUAGUGAACACC-AU-UGUUCACACU-UAUAGAC-GGCCAAUCACACUUCUUGUGG-UUGGCUUUUUUUU

SL1                      SL2                      SL3                      SL4

*V. harveyi*

Qrr1 GGACCCUC-----GGGUCACCUAGCCAACUGACGUUGUUAGUGAACG-ACA--UGUUCACAGA---ACG-A-GCCAAUAGAUCGACUGCCUAUUGGCUUCUUUUUU

Qrr2 CGACCCUUC-UUAAGCCGAGGGUCACCUAGCCAACUGACGUUGUUAGUGAAUACACAU-UGUUCACAAAUAUCAUA-A-GCCAAUCGCCCUAAUUGCG-GUUGGCUAUUUUUUU

Qrr3 UGACCCUUC-UUAAGCCGAGGGUCACCUAGCCAACUGACGUUGUUAGUGGACUCGAAUUUGUUCACAAA-UAUAUA-A-GCCAAUCGCACAAAUUGCG-GUUGGCUAUUUUUUU

Qrr4 AGACCCUA-UUAAGCCGAGGGUCACCUAGCCAACUGACGUUGUUAGUGAAUACACAU-UGUUCACAAG-UAUAUACC-GCCAAUCACUUUAUUGUG-AUUGGCUUUUUUU

Qrr5 UGACCCU--UUAAGCCGAGGGUCACCUAGCCAACUGACGUUGUUAGUGAACCCA-AU-UGUUCACACG-UAUAUACA-GCCAAUCACAAACCUUGUG-GUUGGCUUUUUUUU

SL1                      SL2                      SL3                      SL4

**Figure S5**

RNA sequence alignment of *V. cholerae* Qrr1-4 and *V. harveyi* Qrr1-5. Sequences corresponding to predicted stem-loops are indicated with underlines.

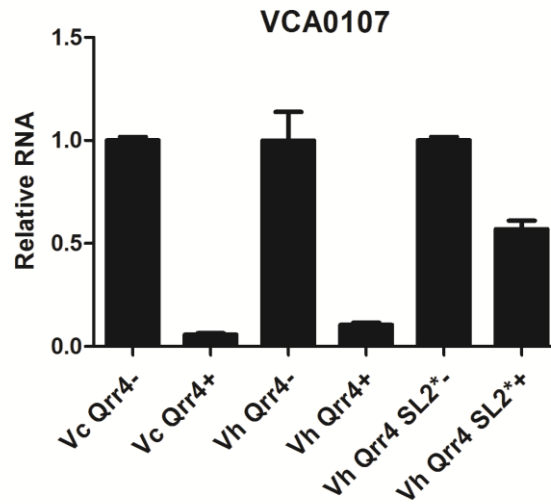

**Figure S6**

The level of VCA0107 mRNA in *V. cholerae* O1 El Tor C6706  $\Delta qrr1-4$ ,  $\Delta tsrA$ , *hapR\** (YS2048) was measured by qRT-PCR before (-) and after (+) 1 hour induction of *V. cholerae* Qrr4 (Vc Qrr4, pYS249), *V. harveyi* Qrr4 (Vh Qrr4, pLF575), or the *V. harveyi* Qrr4 SL2 inversion variant (Vh Qrr4 SL2\*, pYS348). Means and SEMs of triplicate samples are shown, with all measurements normalized to the mean of the uninduced controls.

## $\Delta qrr1-4$

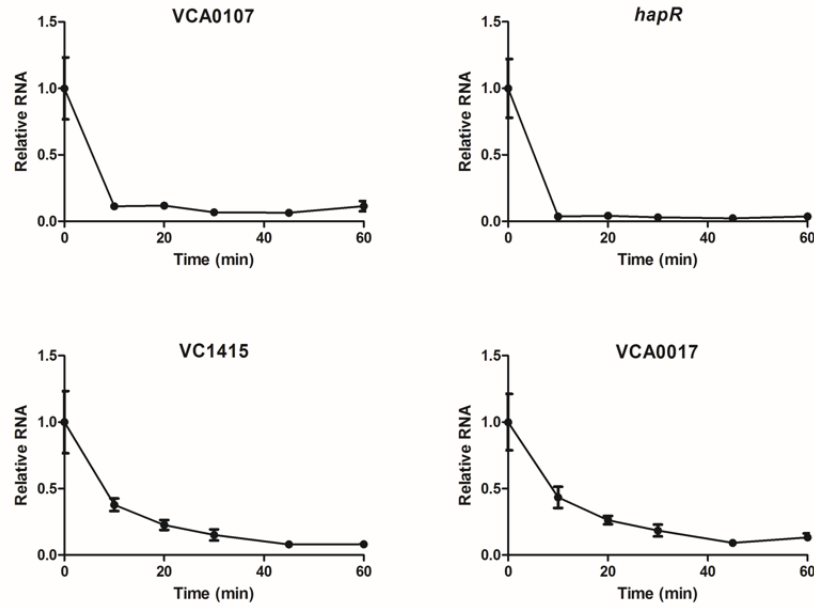

**Figure S7**

mRNA levels of VCA0107, *hapR*, VC1415, and VCA0017 in *V. cholerae* O1 El Tor C6706  $\Delta qrr1-4$  (SLS456) following pulse induction of *V. cholerae* Qrr4 (pYS249) were measured by qRT-PCR. Samples were collected at different time points, and means and SEMs of triplicate samples are shown.



| Strain                      | Relevant Genotype                                                 | Source                             |
|-----------------------------|-------------------------------------------------------------------|------------------------------------|
| <b><i>E. coli</i></b>       |                                                                   |                                    |
| S17 $\lambda$ pir           | wild type                                                         | (de Lorenzo and Timmis, 1994)      |
| BW-RI                       | wild type                                                         | (Levine <i>et al.</i> , 2007)      |
| <b><i>V. cholerae</i></b>   |                                                                   |                                    |
| C6706                       | wild type                                                         | (Thelin and Taylor, 1996)          |
| 2740-80                     | wild type                                                         | (Basler <i>et al.</i> , 2013)      |
| V52                         | wild type                                                         | (Pukatzki <i>et al.</i> , 2006)    |
| SLS456                      | C6706 $\Delta qrr1-4$                                             | (Svenningsen <i>et al.</i> , 2009) |
| YS2029                      | 2740-80 $\Delta hapR$                                             | this study                         |
| YS2030                      | V52 $\Delta hapR$                                                 | this study                         |
| YS2031                      | C6706 $\Delta tsrA$                                               | this study                         |
| YS2032                      | C6706 <i>luxOD47E</i> $\Delta tsrA$                               | this study                         |
| YS2033                      | C6706 $\Delta luxO$ $\Delta tsrA$                                 | this study                         |
| YS2034                      | C6706 $\Delta tsrA$ $\Delta hapR$                                 | this study                         |
| YS2037                      | C6706 <i>luxOD47E</i> $\Delta qrr1-4$ $\Delta tsrA$               | this study                         |
| YS2039                      | C6706 $\Delta qrr1-4$ $\Delta tsrA$                               | this study                         |
| YS2040                      | C6706 $\Delta qrr1-4$ $\Delta tsrA$ $\Delta hapR$                 | this study                         |
| YS2047                      | C6706 <i>luxOD47E</i> $\Delta qrr1-4$ $\Delta tsrA$ <i>hapR</i> * | this study                         |
| YS2048                      | C6706 $\Delta qrr1-4$ $\Delta tsrA$ <i>hapR</i> *                 | this study                         |
| <b><i>P. aeruginosa</i></b> |                                                                   |                                    |
| PAO1                        | wild type                                                         | (Holloway, 1955)                   |

**Table S1 Strains used in this study.**

| Plasmid     | Description                                           | Source                             |
|-------------|-------------------------------------------------------|------------------------------------|
| pEVS143     | vector                                                | (Dunn <i>et al.</i> , 2006)        |
| pZA31-lucNB | vector                                                | (Levine <i>et al.</i> , 2007)      |
| pZE12       | vector                                                | (Levine <i>et al.</i> , 2007)      |
| pSLS155     | pEVS143-Vc Qrr4 (constitutive promoter)               | (Svenningsen <i>et al.</i> , 2009) |
| pKAS32      | vector for chromosomal mutation in <i>V. cholerae</i> | (Skorupski and Taylor, 1996)       |
| pMM1162     | pKAS32 for <i>hapR</i> deletion                       | (Miller <i>et al.</i> , 2002)      |
| pLF253      | pZA31-lucNB empty vector                              | (Shao <i>et al.</i> , 2013)        |
| pLF127      | pZA31-lucNB-Vh Qrr4                                   | (Shao <i>et al.</i> , 2013)        |
| pLF575      | pEVS143-ara-Vh Qrr4                                   | (Shao <i>et al.</i> , 2013)        |
| pYS230      | pZA31-lucNB-Vh Qrr4 SL1*                              | (Shao <i>et al.</i> , 2013)        |
| pYS231      | pZA31-lucNB-Vh Qrr4 SL2*                              | (Shao <i>et al.</i> , 2013)        |
| pYS232      | pZA31-lucNB-Vh Qrr4 SL3*                              | (Shao <i>et al.</i> , 2013)        |
| pYS245      | pZA31-lucNB-Vc Qrr4                                   | this study                         |
| pYS249      | pEVS143-ara-Vc Qrr4                                   | this study                         |
| pYS254      | pZE12-VCA0107-GFP                                     | this study                         |
| pYS335      | pKAS32 for <i>tsrA</i> deletion                       | this study                         |
| pYS345      | pKAS32 for <i>hapR</i> *                              | this study                         |
| pYS347      | pZE12-VC1415/VCA0017-GFP                              | this study                         |
| pYS348      | pEVS143-ara-Vh Qrr4 SL2*                              | this study                         |
| pYS350      | pZE12-VCA0107(BP-)-GFP                                | this study                         |

**Table S2 Plasmids used in this study.**

| Primer  | Sequence                                                              | Use                 |
|---------|-----------------------------------------------------------------------|---------------------|
| YS757   | ATAGGATCCATCAAATAAAACGAAAGGCTC                                        | pYS245              |
| YS758   | GTGCTCAGTATCTCTATCACTGATAGG                                           | pYS245              |
| YS765   | TGACCCTTCTAAGCCGAGGGTC                                                | pYS245/pYS249       |
| YS766   | GCGGGATCCCAAGATGCTATGGCGAATGTGGTG                                     | pYS245              |
| YS767   | CCGGGTACCAGGATCCGGTGATTGATTGAGCAAG                                    | pYS249              |
| YS768   | GGAGAAACAGTAGAGAGTTGCGATAAAAAG                                        | pYS249              |
| YS772   | GCGGGTACCCAAGATGCTATGGCGAATGTGGTG                                     | pYS249              |
| YS794   | GCTGCTAATGATAAGTTTGCATAATAAGCC                                        | pYS254              |
| YS796   | AATAGGTACCTTTGGGAGCTACACTTCCTTCTTTAGA                                 | pYS254              |
| YS997   | GTGCTCAGTATCTTGTTATCCGCTC                                             | pYS254/pYS347       |
| YS998   | GCGGGTACCATGTCTAAAGGTGAAGAAC                                          | pYS254/pYS347       |
| YS811   | GCGGGTACCATGTTAATGGCTCGGTTGCTACAAGG                                   | pYS335              |
| YS812   | GGTGT TTTGGATTCCAACGGTTAGTC                                           | pYS335              |
| YS813   | CGTTTGG AATCCAAAACACCTCGAACGCTCATTCCCTATATCGCC                        | pYS335              |
| YS814   | GCGCCTAGGCAGTCCCTGTA ACTTGCCATTGCAG                                   | pYS335              |
| YS1146  | GCGGGTACCGTTTTGTCTACGGTATCGAGGATGG                                    | pYS345              |
| YS1147  | GCGCCTAGGCCGTAAGAAAGGCCGAAATGGTGC                                     | pYS345              |
| YS1148  | GGAATTGAGTTGTTGATTGAGCATT TTTGCTC                                     | pYS345              |
| YS1149  | GCTCAATCAACA ACTCAATTCCCAAGGATATACCCCTATGGACGC                        | pYS345              |
| YS1195  | ACGGTGCGCAGAGCGCGTTAA                                                 | pYS347              |
| YS1197  | AATAGGTACCTTCGATAGAGATATAACATGGAGTTGGCAT                              | pYS347              |
| YS733   | CCTTATTAAGCCGAGGGTCATTGTTGCAGTCAACCGATCCAGTGA<br>ATACACATTGTTCCAC     | pYS348              |
| YS734   | GTGAACAATGTGTATTCACTGGATCGGTTGACTGCAACAATGACC<br>CTCGGCTTAATAAGG      | pYS348              |
| YS1200  | TGATTGAATGATTTCAATCAACTGTAAGTAACTGTTGCAATGGCAT<br>AGGTATTGGAGACGTAATA | pYS350              |
| YS1201  | TATTACGTCTCCAATACCTATGCCATTGCAACAGTTACTTACAGTT<br>GATTGAAATCATTCAATCA | pYS350              |
| STR0382 | CTAAGGGGCAATCTCTACAAG                                                 | <i>hfq</i> qRT-PCR  |
| STR0383 | AATTGATCAAATGATTGATCTGA                                               | <i>hfq</i> qRT-PCR  |
| YS1084  | AAATCGCGTTGGAAGTGTTT                                                  | <i>hapR</i> qRT-PCR |
| YS1085  | CGAGTTGGGAAGTAGTTGAA                                                  | <i>hapR</i> qRT-PCR |
| YS1153  | ATTGATTGAGTTGCGTGAAG                                                  | VCA0107 qRT-PCR     |
| YS1154  | TCTCTGACTCTTCTGAGTT                                                   | VCA0107 qRT-PCR     |
| YS1206  | GAAAACCGTTGAGCTGAAGT                                                  | VC1415 qRT-PCR      |
| YS1207  | TGGATGTCGACGATAGACGC                                                  | VC1415 qRT-PCR      |
| YS1165  | GAAAACCGTTGAGCTGAAAT                                                  | VCA0017 qRT-PCR     |
| YS1166  | TGGATATCAACGATAGACGC                                                  | VCA0017 qRT-PCR     |

**Table S3 Primers used in this study.**

## References

- Basler, M., Ho, B.T., and Mekalanos, J.J. (2013) Tit-for-tat: type VI secretion system counterattack during bacterial cell-cell interactions. *Cell* **152**: 884–94
- Dunn, A.K., Millikan, D.S., Adin, D.M., Jeffrey, L., Stabb, E. V, and Bose, J.L. (2006) New rfp - and pES213-Derived Tools for Analyzing Symbiotic *Vibrio fischeri* Reveal Patterns of Infection and lux Expression In Situ. *Appl Environ Microbiol* .
- Holloway, B.W. (1955) Genetic recombination in *Pseudomonas aeruginosa*. *J Gen Microbiol* **13**: 572–81
- Levine, E., Zhang, Z., Kuhlman, T., and Hwa, T. (2007) Quantitative characteristics of gene regulation by small RNA. *PLoS Biol* **5**: e229
- Lorenzo, V. de, and Timmis, K.N. (1994) Analysis and construction of stable phenotypes in gram-negative bacteria with Tn5- and Tn10-derived minitransposons. *Methods Enzymol* **235**: 386–405.
- Miller, M.B., Skorupski, K., Lenz, D.H., Taylor, R.K., and Bassler, B.L. (2002) Parallel Quorum Sensing Systems Converge to Regulate Virulence in *Vibrio cholerae*. *Cell* **110**: 303–314.
- Pukatzki, S., Ma, A.T., Sturtevant, D., Krastins, B., Sarracino, D., Nelson, W.C., *et al.* (2006) Identification of a conserved bacterial protein secretion system in *Vibrio cholerae* using the *Dictyostelium* host model system. *Proc Natl Acad Sci U S A* **103**: 1528–33
- Shao, Y., Feng, L., Rutherford, S.T., Papenfort, K., and Bassler, B.L. (2013) Functional determinants of the quorum-sensing non-coding RNAs and their roles in target regulation. *EMBO J* **32**: 2158–71
- Skorupski, K., and Taylor, R.K. (1996) Positive selection vectors for allelic exchange. *Gene* **169**: 47–52
- Svenningsen, S.L., Tu, K.C., and Bassler, B.L. (2009) Gene dosage compensation calibrates four regulatory RNAs to control *Vibrio cholerae* quorum sensing. *EMBO J* **28**: 429–39
- Thelin, K.H., and Taylor, R.K. (1996) Toxin-coregulated pilus, but not mannose-sensitive hemagglutinin, is required for colonization by *Vibrio cholerae* O1 El Tor biotype and O139 strains. *Infect Immun* **64**: 2853–6
